# Supplementary material for: The Association Between New Insulin Resistance Indices and All-Cause Mortality in Elderly Patients with Diabetes: A Prospective Cohort Study
Source: Research Square preprint supplement (doi:10.21203/rs.3.rs-5858003/v1), 2025-04-15

**Supplemental Materials**

1. **Supplemental Tables**

**Supplemental Table 1. Causes of Death in the Total Cohort**

**2. Supplemental Figures**

**Supplemental Figure 1. Schematic Diagram of the LASSO Regression Variable Selection Process**

**Supplemental Figure 2. Association between IR Indices and All-cause Mortality in the Total Cohort**

**Supplemental Figure 3. Association between IR Indices and All-cause Mortality in the Male Cohort**

**Supplemental Figure 4. Association between IR Indices and All-cause Mortality in the Female Cohort**

**Supplemental Figure 5. Sensitivity Analysis of the Associations between IR Indices and All-cause Mortality**

**Supplemental Table 1. Causes of Death in the Total Cohort**

| Cause of death | ICD-10 codes | Number of events |
| --- | --- | --- |
| All cause |  | 805 |
| Cardiovascular disease | I00-I09, I11, I13, and I20-I51 | 250 |
| Cancer | C00-C97 | 144 |
| Diabetes mellitus | E10-E14 | 80 |
| Alzheimer’s disease | G30 | 28 |
| Chronic lower respiratory diseases | J40-J47 | 25 |
| Nephritis, nephrotic syndrome, and nephrosis | N00-N07, N17-N19, and N25-N27 | 23 |
| Influenza and pneumonia | J09-J18 | 20 |
| Accidents (unintentional injuries) | V01-X59, Y85-Y86 | 16 |
| Other causes |  | 219 |

ICD, International Statistical Classification of Disease.

**Supplemental Table 2. The VIF values of the excluded variables**

| Variable | TG | HDL-C | TC | LDL-C | WC |
| --- | --- | --- | --- | --- | --- |
| VIF value | 3228.779182 | 2032.960150 | 26443.141576 | 20375.962016 | 7.993481 |

Abbreviations: TG, fasting triglyceride; HDL-C, high-density lipoprotein cholesterol; TC, total cholesterol; LDL-C, low-density lipoprotein cholesterol; WC, waist circumference;

**Supplemental Figure 1. Schematic Diagram of the LASSO Regression Variable Selection Process**


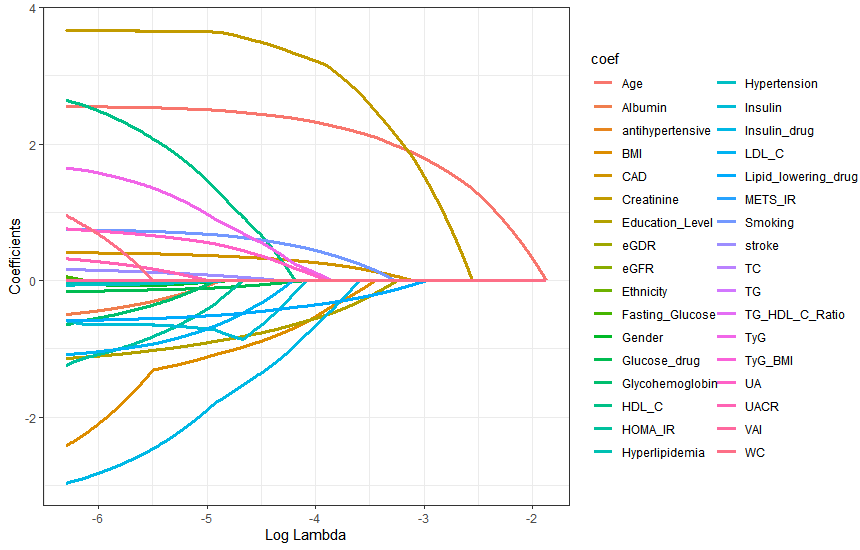

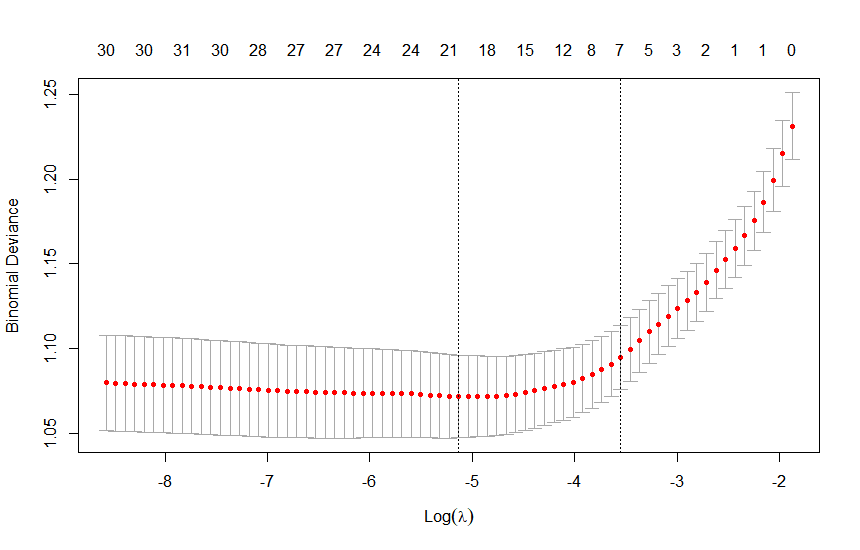


**Supplemental Figure 2. Association between IR Indices and All-cause Mortality in the Total Cohort**


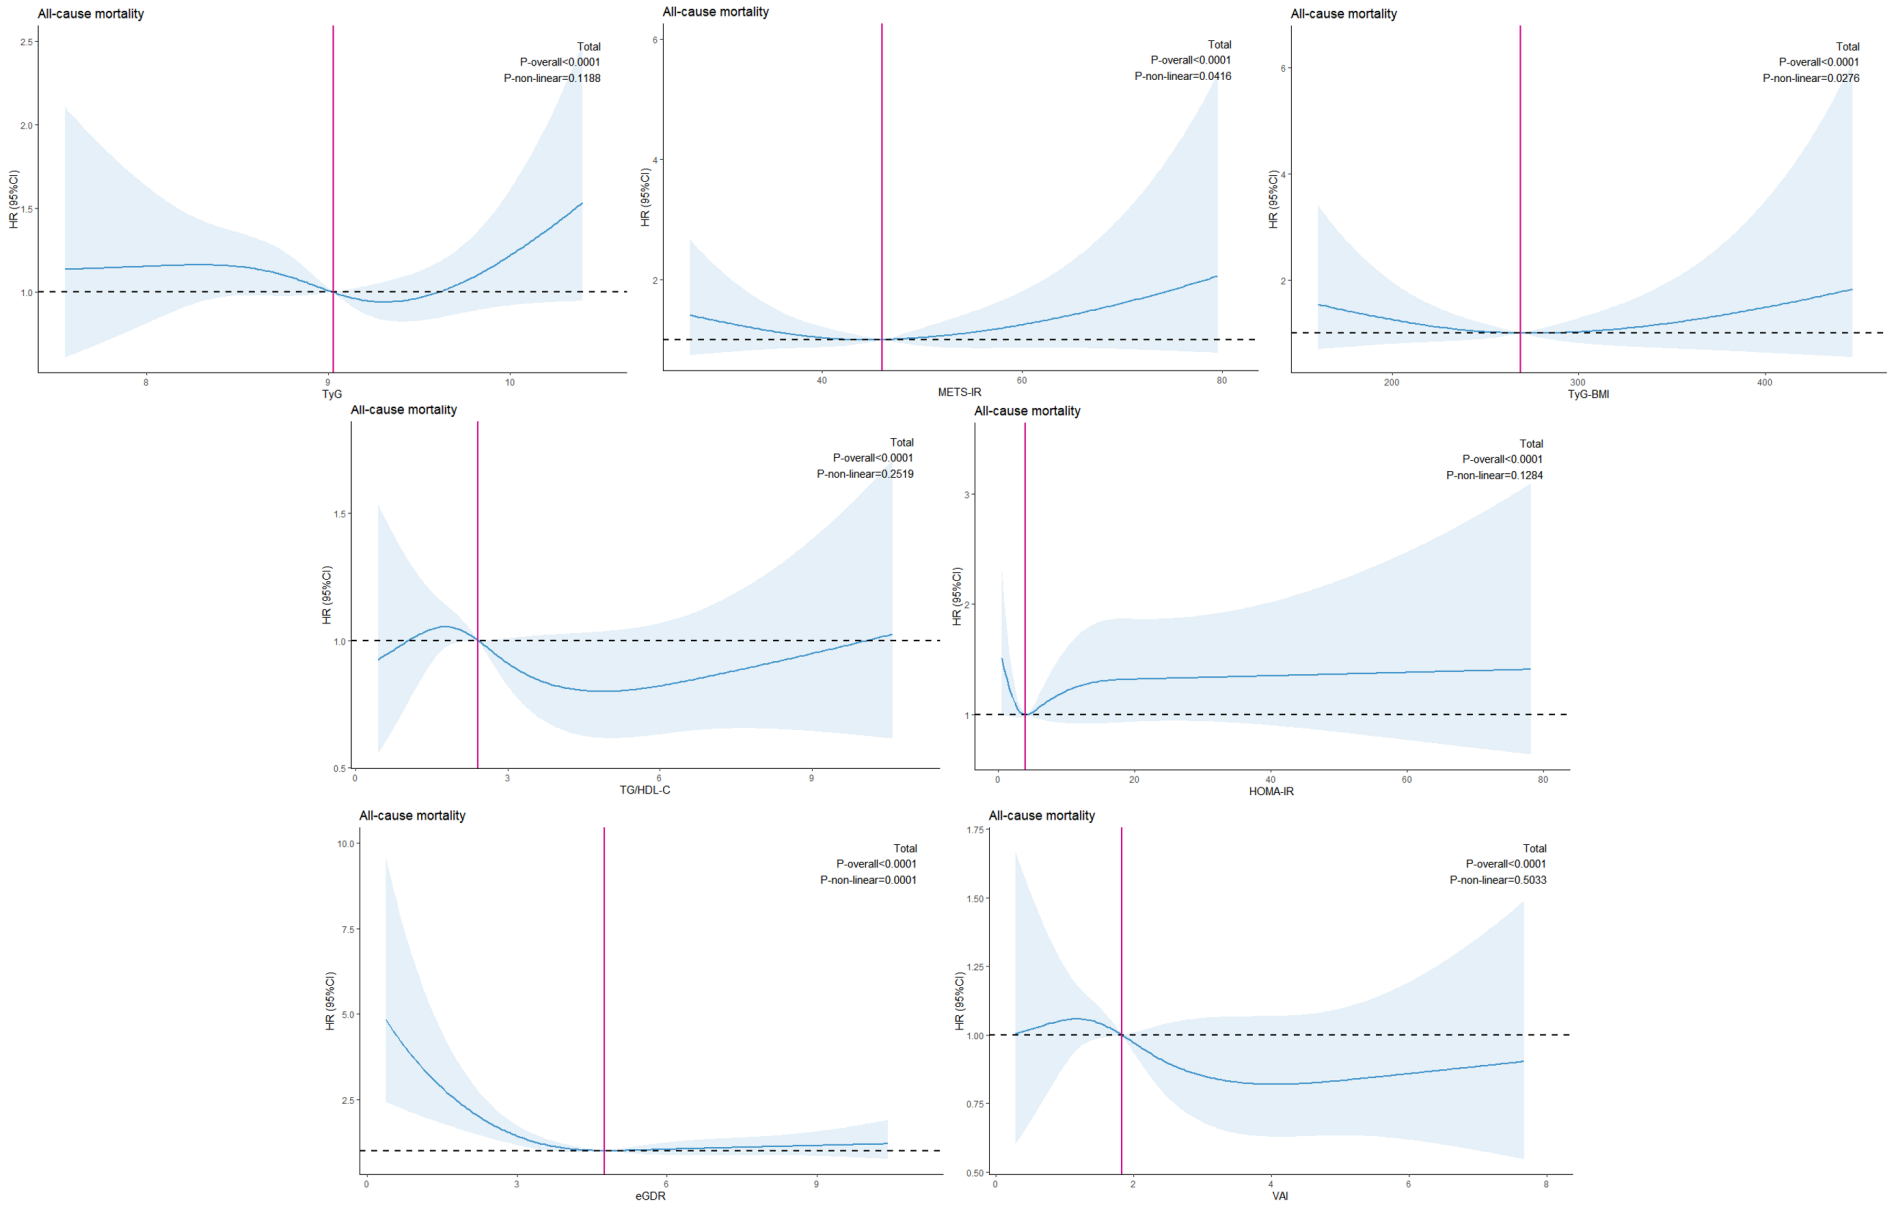


Models for all-cause mortality were adjusted for age, ethnicity, educational level, BMI, albumin, UACR, UA, creatinine, smoking, Insulin treatment, hypoglycemic drugs, antihypertensive drugs, lipid-lowering drugs, hypertension, hyperlipidemia, stroke, CAD, fasting-glucose, fasting-Insulin, HbA1c, eGFR.

**Supplemental Figure 3. Association between IR Indices and All-cause Mortality in the Male Cohort**


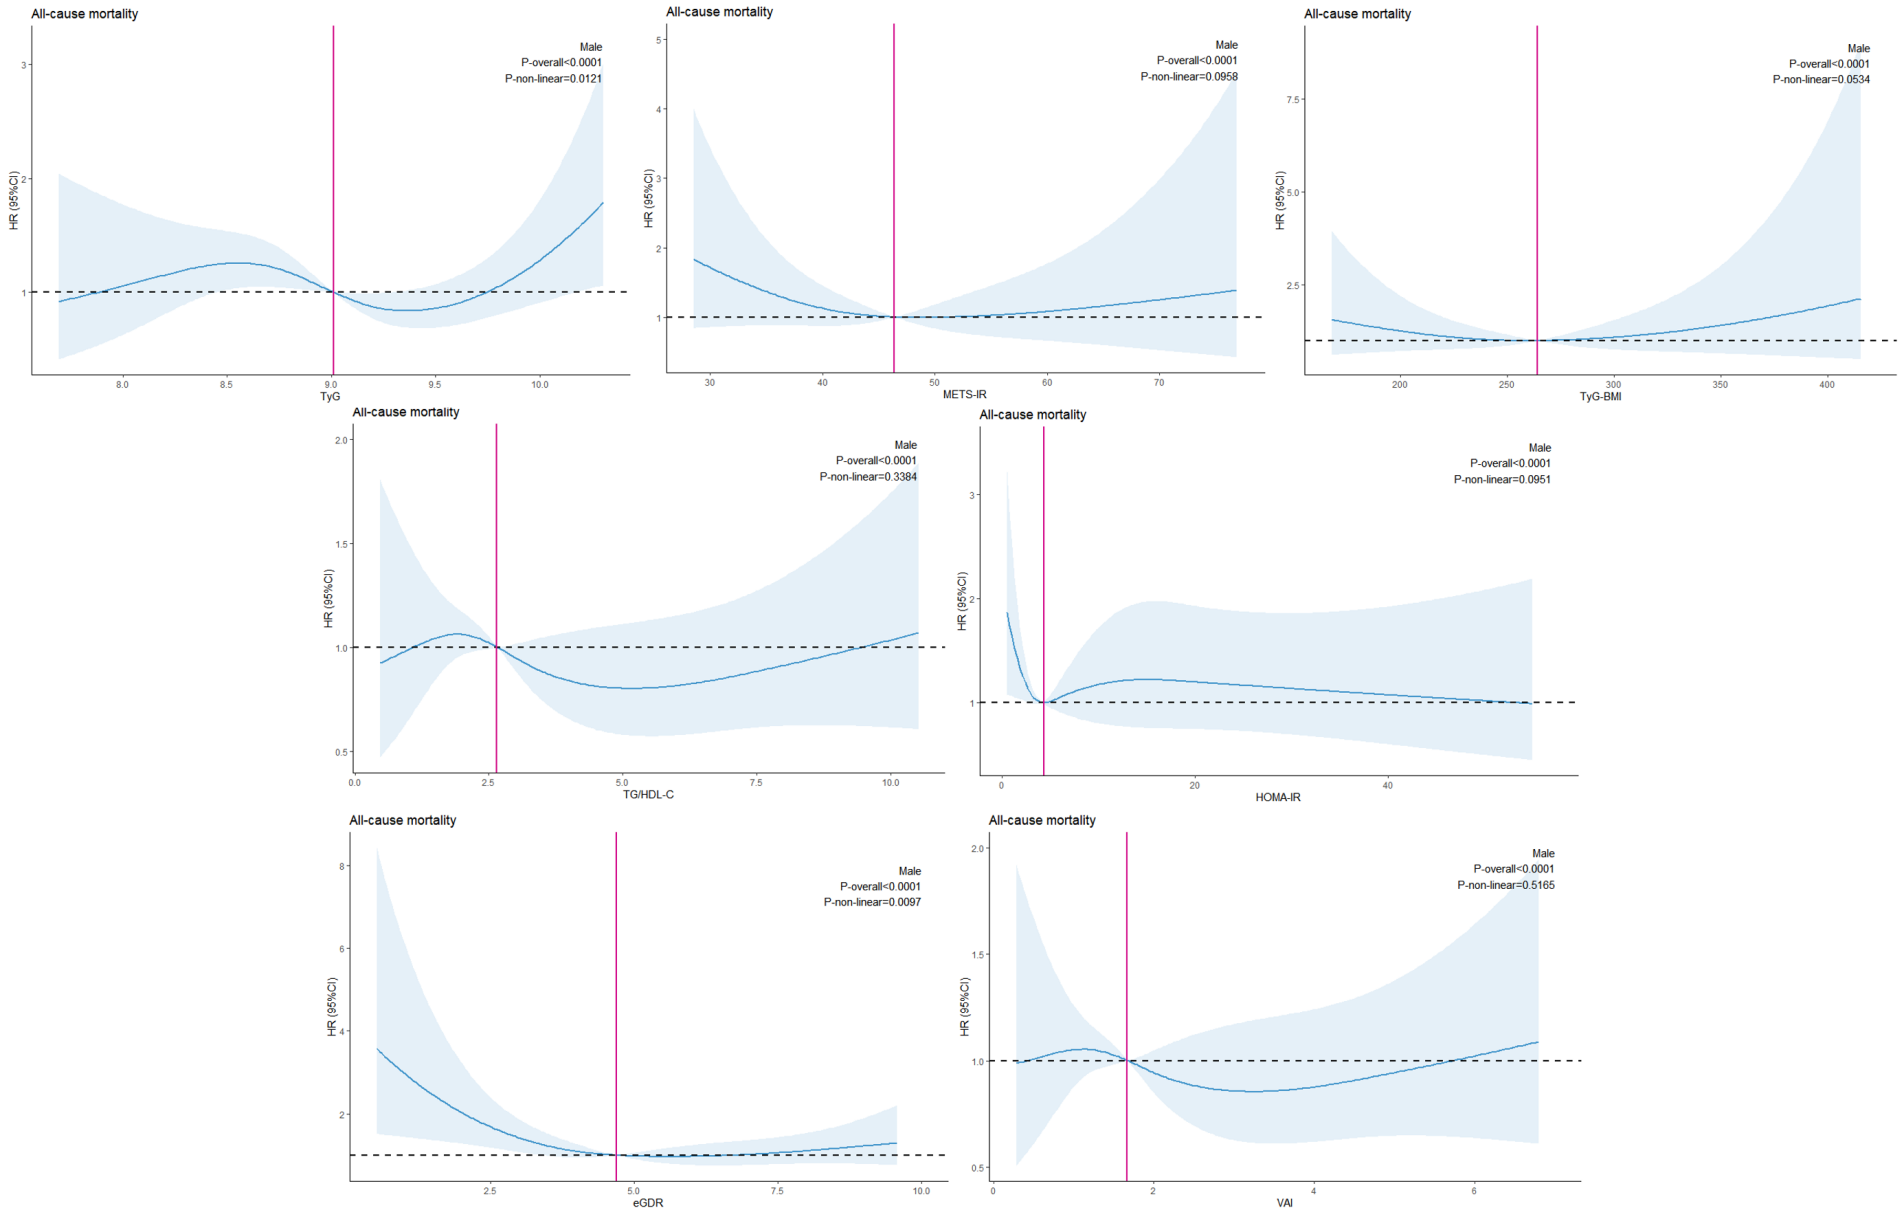


Models for all-cause mortality were adjusted for age, ethnicity, educational level, BMI, albumin, UACR, UA, creatinine, smoking, Insulin treatment, hypoglycemic drugs, antihypertensive drugs, lipid-lowering drugs, hypertension, hyperlipidemia, stroke, CAD, fasting-glucose , fasting-Insulin, HbA1c, eGFR.

**Supplemental Figure 4. Association between IR Indices and All-cause Mortality in the Female Cohort**


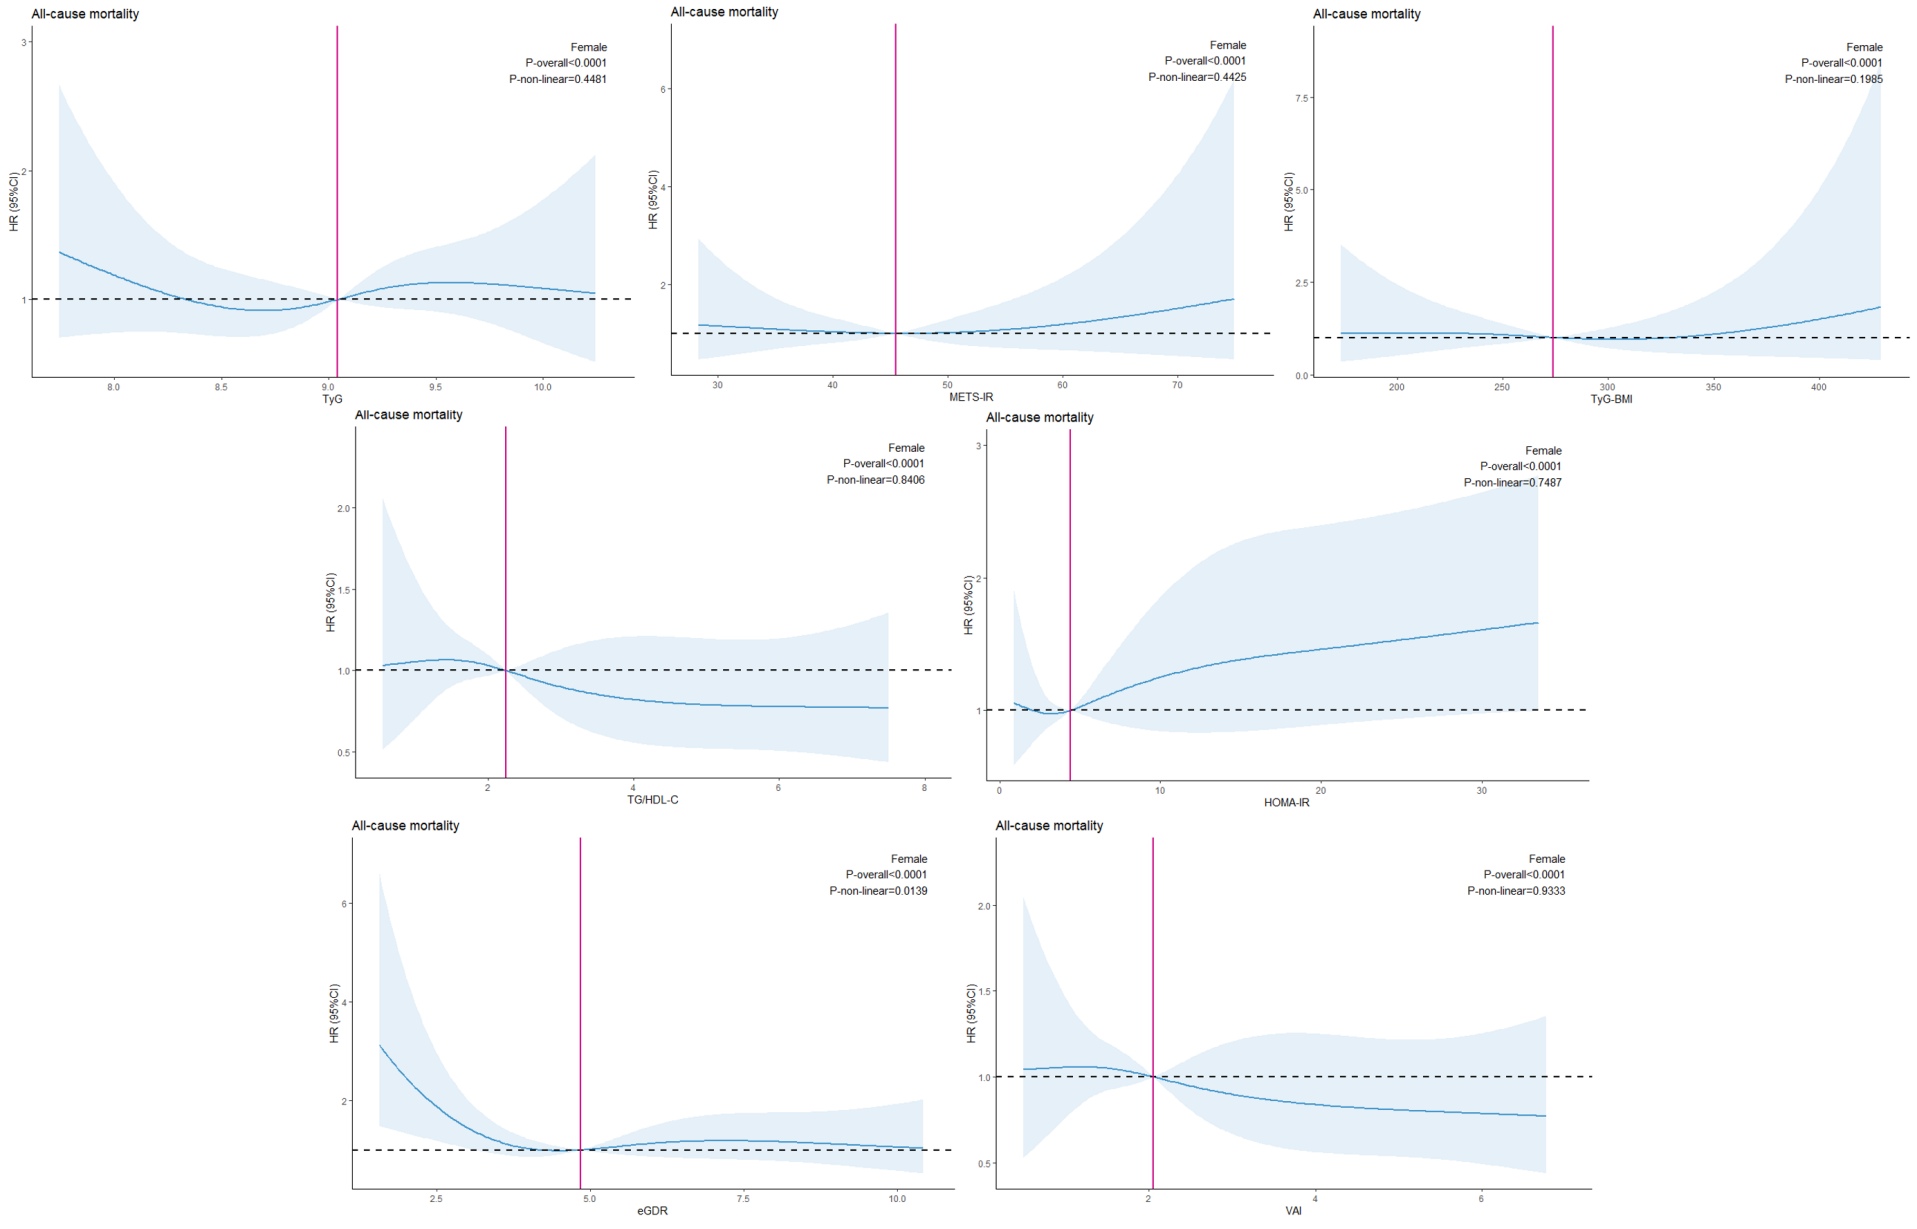


Models for all-cause mortality were adjusted for age, ethnicity, educational level, BMI, albumin, UACR, UA, creatinine, smoking, Insulin treatment, hypoglycemic drugs, antihypertensive drugs, lipid-lowering drugs, hypertension, hyperlipidemia, stroke, CAD, fasting-glucose, fasting-Insulin, HbA1c, eGFR.

**Supplemental Figure 5. Sensitivity Analysis of the Associations between IR Indices and All-cause Mortality**


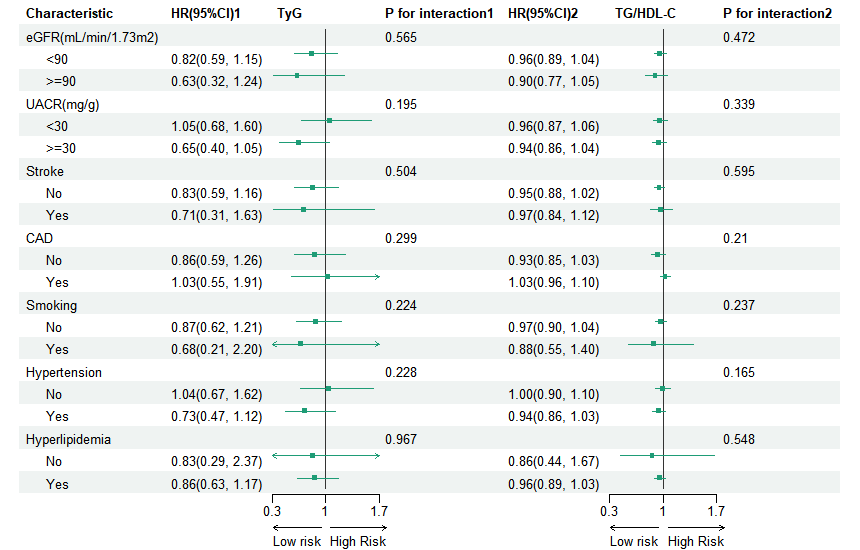

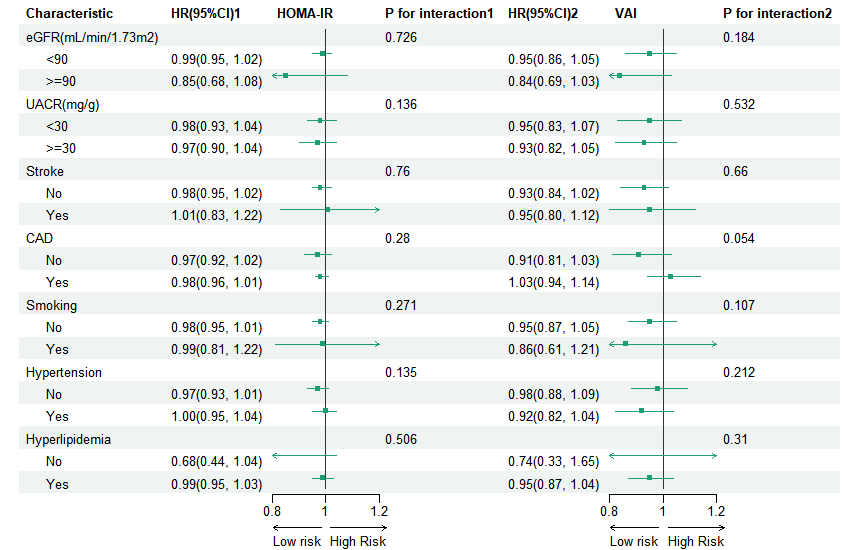

Supplement: Supplementary file 1 [file 9445082a09eb0d8a87d6fab1.docx]
